# Supplementary material for: Pharmacokinetics of ß-d-N4-hydroxycytidine, the parent nucleoside of prodrug molnupiravir, in non-plasma compartments of patients with SARS-CoV-2 infection
Source: bioRxiv or medRxiv preprint supplement (doi:10.1101/2021.12.06.21267342), 2022-03-02

**Supplementary Figure 1** Individual NHC concentration-time profiles from saliva (closed points, solid line), nasal swabs (open points, solid line) and tear strips (closed points, broken lines) of patients with SARS-CoV-2 following single dose (Day 1; left pane) and multiple dose (Day 5; right pane) molnupiravir (A) 300 mg, (B) 600 mg and (C) 800 mg twice daily. Data are expressed on a log-linear scale.

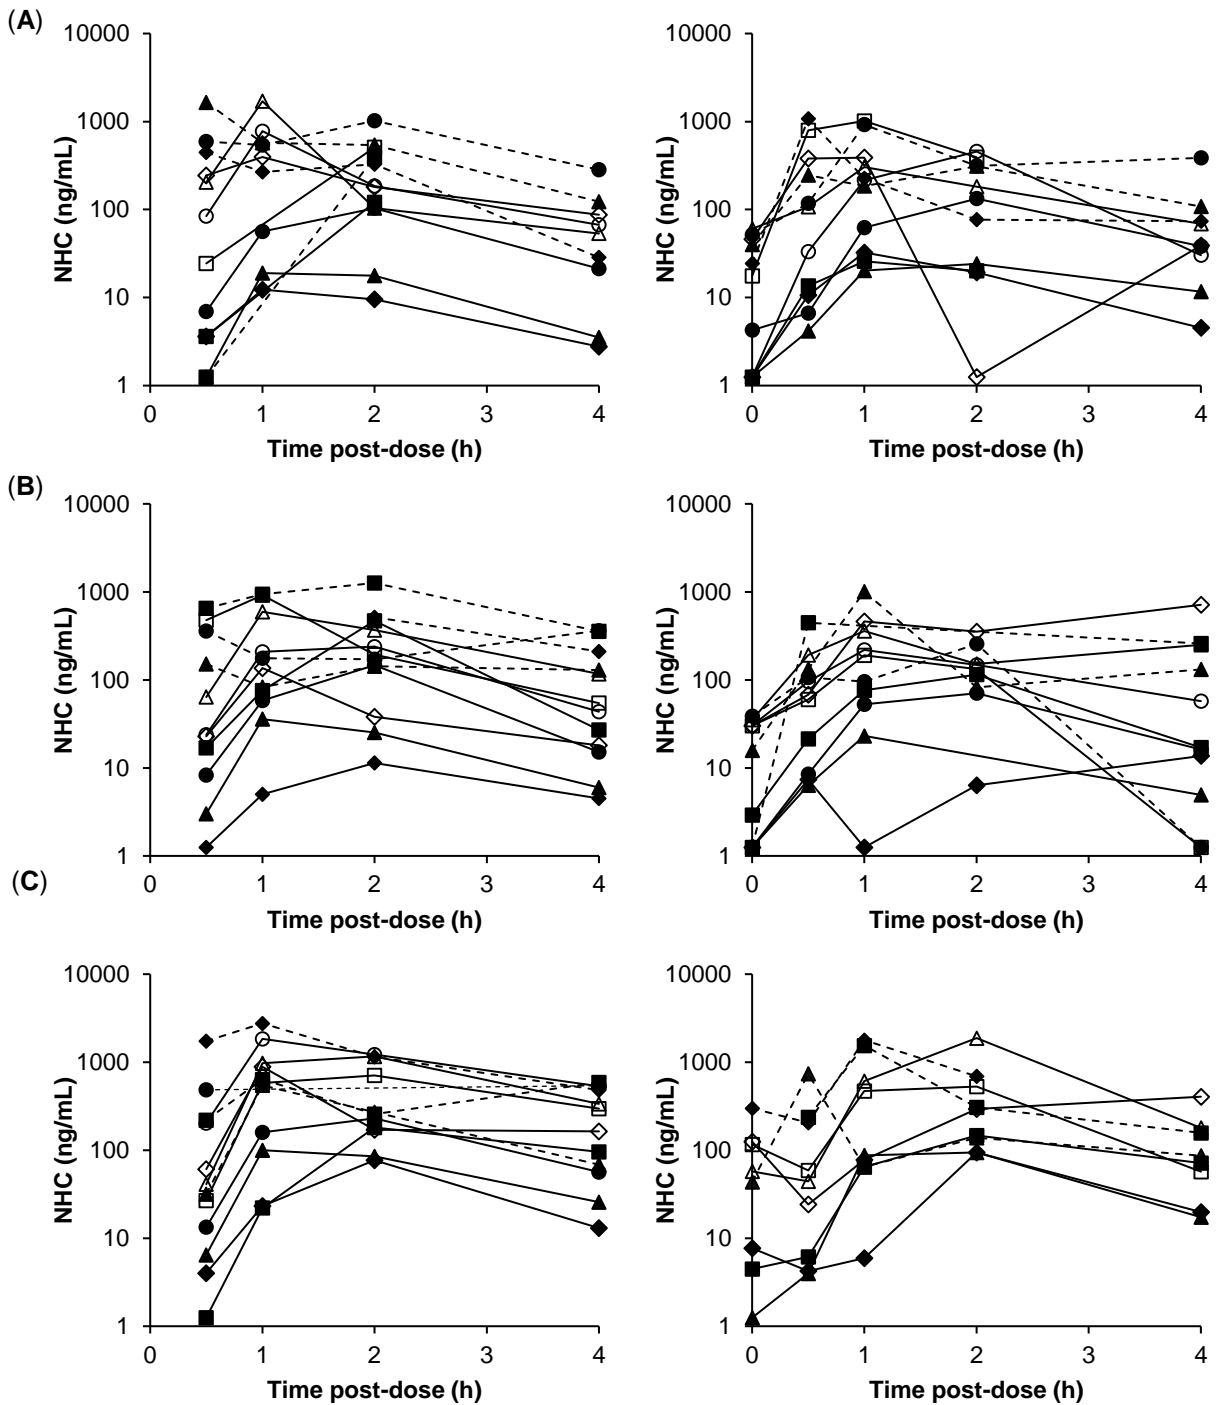

Supplement: Supplementary file [file media-1.pdf]
